# Supplementary material for: A transcriptome-based model of central memory CD4 T cell death in HIV infection
Source: PubMed Central journal article supplement (PMC5120471; doi:10.1186/s12864-016-3308-8), 2016-11-22
Supplement: 12864_2016_3308_MOESM1_ESM.pdf [file 12864_2016_3308_MOESM1_ESM.pdf]

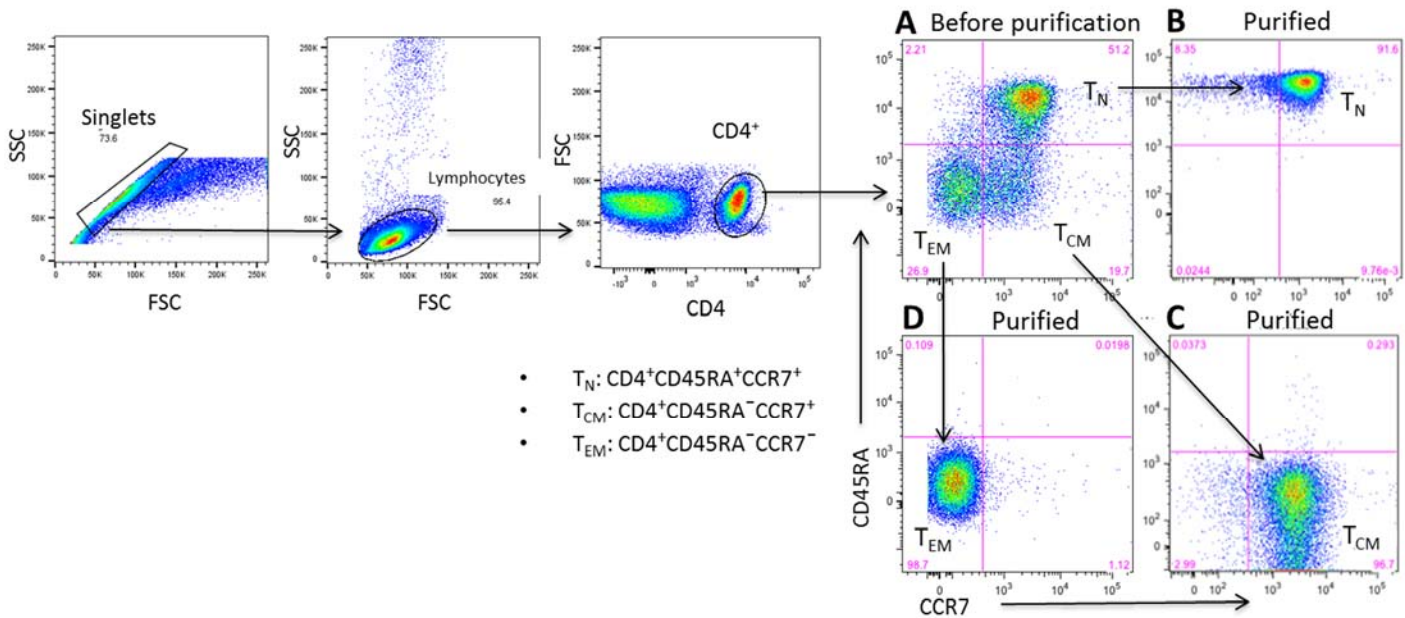

**Additional file 1. CD4 T cell subpopulations were separated with at least 90% purity.** Single CD4 lymphocytes were sub-gated into maturation subpopulations according to the expression of CCR7 and CD45RA. (A) Subpopulations among PBMCs previous to purification. (B) Purified  $T_N$ , naive CD4 T cells. (C) Purified  $T_{CM}$ , central memory CD4 T cells. (D)  $T_{EM}$ , effector memory CD4 T cells. Each subpopulation sample was obtained from a single HIV patient or healthy control with a purity of at least 90%. Gates were delineated using an FMO control for CCR7.
