# Supplementary material for: A transcriptome-based model of central memory CD4 T cell death in HIV infection
Source: PubMed Central journal article supplement (PMC5120471; doi:10.1186/s12864-016-3308-8), 2016-11-22
Supplement: 12864_2016_3308_MOESM4_ESM.pdf [file 12864_2016_3308_MOESM4_ESM.pdf]

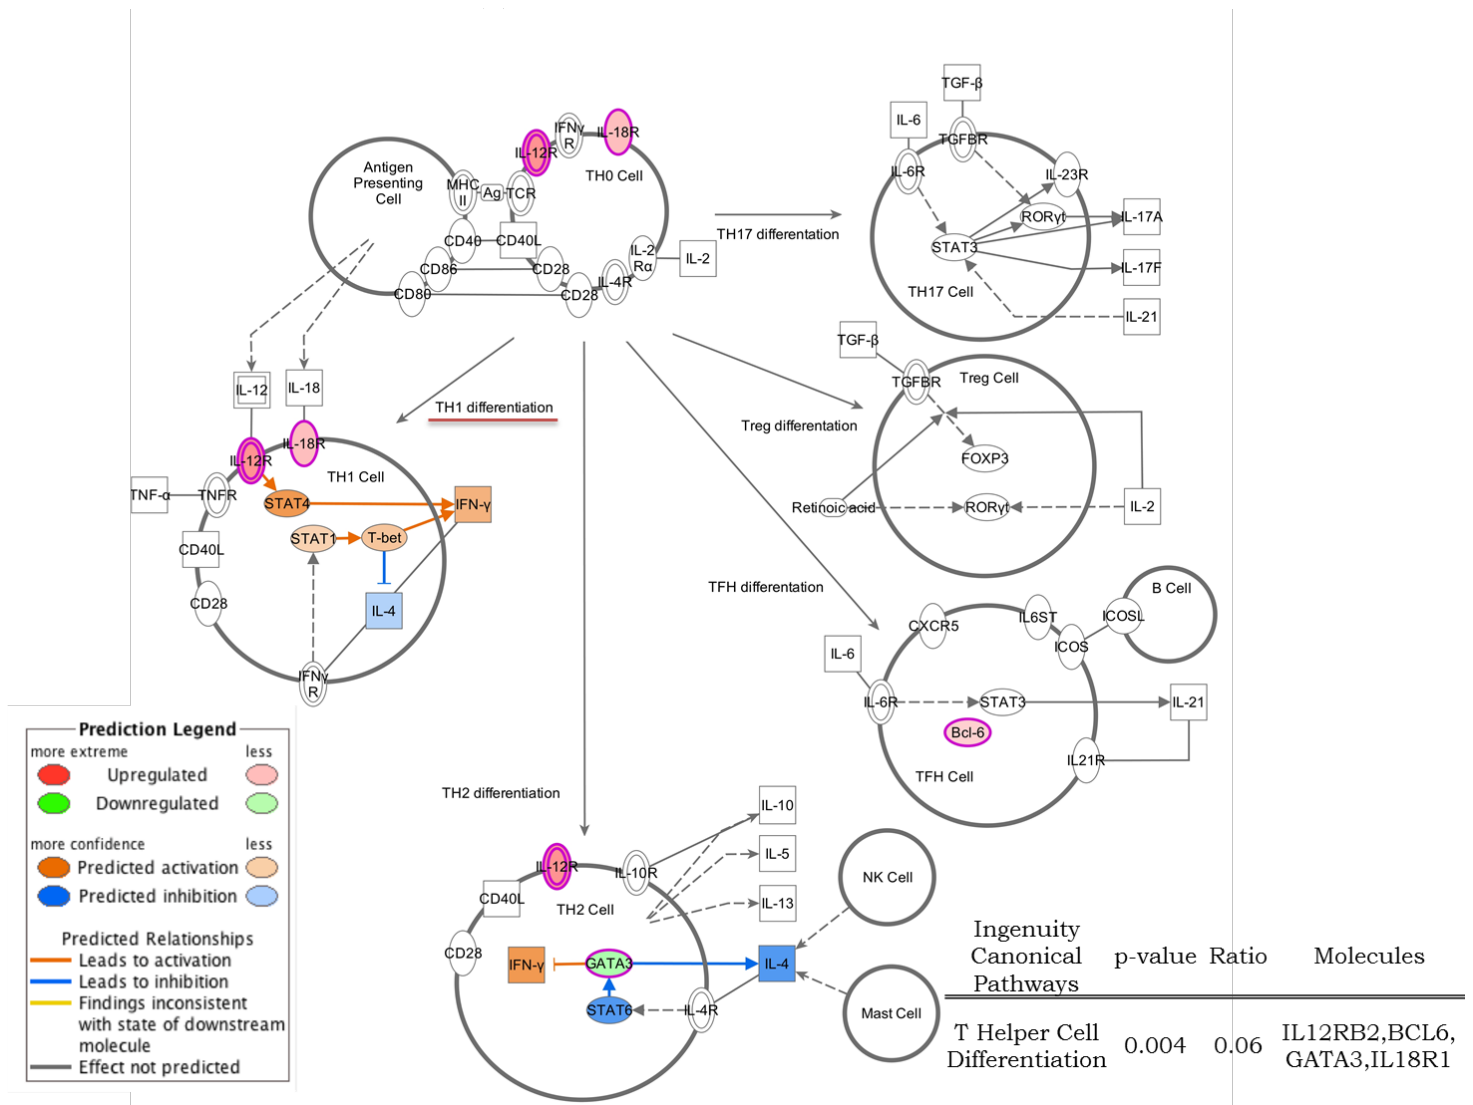

**Additional file 4. Th1 polarization pathway is enriched in T<sub>CM</sub> cells from HIV infection.** Gene expression signature of T<sub>CM</sub> cells from HIV<sup>+</sup> patients is consistent with a Th1-skewed functionality, according to the output of Ingenuity Canonical Pathways analysis.
