# Supplementary material for: A transcriptome-based model of central memory CD4 T cell death in HIV infection
Source: PubMed Central journal article supplement (PMC5120471; doi:10.1186/s12864-016-3308-8), 2016-11-22
Supplement: 12864_2016_3308_MOESM5_ESM.pdf [file 12864_2016_3308_MOESM5_ESM.pdf]

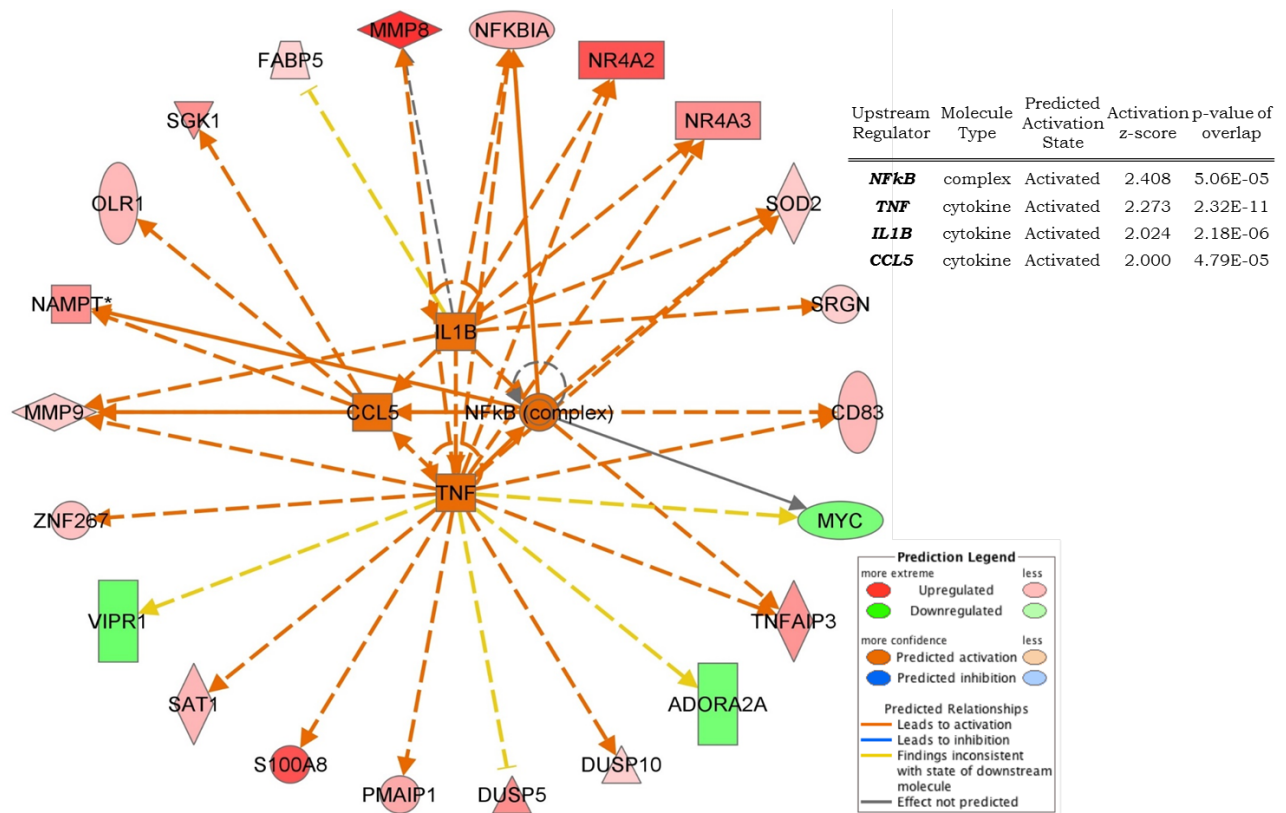

**Additional file 5. Upstream analysis of the gene expression signature of T<sub>CM</sub> cells from HIV.** Upstream molecules related with the gene expression signature of HIV<sup>+</sup> T<sub>CM</sub> cells are associated with inflammatory signaling through CCL5, IL1 $\beta$ , TNF- $\alpha$ , and NF $\kappa$ B pathways. These upstream molecules had the highest z-score using IPA.
