# Supplementary material for: A transcriptome-based model of central memory CD4 T cell death in HIV infection
Source: PubMed Central journal article supplement (PMC5120471; doi:10.1186/s12864-016-3308-8), 2016-11-22
Supplement: 12864_2016_3308_MOESM8_ESM.pdf [file 12864_2016_3308_MOESM8_ESM.pdf]

| <b>Proliferation of tumor cell lines</b><br><b>z-score = 2.7 (increased)</b> |            |                   |          |
|------------------------------------------------------------------------------|------------|-------------------|----------|
| Genes in dataset                                                             | Prediction | $\Delta\Delta Ct$ | p-value  |
| <i>MMP9</i>                                                                  | Increased  | 4.960             | 1.20E-10 |
| <i>SIK1</i>                                                                  | Increased  | 4.219             | 1.05E-26 |
| <i>AREG</i>                                                                  | Increased  | 3.486             | 8.61E-15 |
| <i>ENC1</i>                                                                  | Increased  | 3.190             | 6.76E-20 |
| <i>PBK</i>                                                                   | Increased  | 2.770             | 1.84E-07 |
| <i>MNDA</i>                                                                  | Increased  | 2.525             | 2.47E-12 |
| <i>IL12RB2</i>                                                               | Increased  | 2.364             | 4.83E-17 |
| <i>TYMS</i>                                                                  | Increased  | 1.889             | 2.47E-13 |
| <i>PFKFB3</i>                                                                | Increased  | 1.756             | 2.50E-11 |
| <i>CD38</i>                                                                  | Increased  | 1.688             | 7.78E-15 |
| <i>CCNE1</i>                                                                 | Increased  | 1.648             | 3.17E-16 |
| <i>DTL</i>                                                                   | Increased  | 1.610             | 6.68E-09 |
| <i>NAMPT</i>                                                                 | Increased  | 1.610             | 3.62E-16 |
| <i>E2F8</i>                                                                  | Increased  | 1.510             | 9.92E-11 |
| <i>PER1</i>                                                                  | Increased  | 1.475             | 1.15E-11 |
| <i>NFKB1A</i>                                                                | Increased  | 1.429             | 2.38E-20 |
| <i>MK167</i>                                                                 | Increased  | 1.220             | 9.68E-09 |
| <i>PRC1</i>                                                                  | Increased  | 1.150             | 1.10E-12 |
| <i>CHEK1</i>                                                                 | Increased  | 1.110             | 5.31E-13 |
| <i>ADAM9</i>                                                                 | Increased  | 1.090             | 3.46E-08 |
| <i>ODC1</i>                                                                  | Increased  | 1.069             | 1.48E-14 |
| <i>DUSP10</i>                                                                | Increased  | 1.060             | 2.45E-12 |
| <i>KIF11</i>                                                                 | Increased  | 0.994             | 4.33E-09 |
| <i>VAV3</i>                                                                  | Increased  | 0.950             | 1.42E-11 |
| <i>PTGER4</i>                                                                | Increased  | 0.861             | 1.34E-13 |
| <i>ZNF267</i>                                                                | Increased  | 0.791             | 1.27E-10 |
| <i>MXD1</i>                                                                  | Increased  | 0.670             | 1.40E-08 |
| <i>NR4A3</i>                                                                 | Increased  | 0.551             | 1.96E-03 |
| <i>PTP4A1</i>                                                                | Increased  | 0.529             | 2.85E-05 |
| <i>NCAFG</i>                                                                 | Increased  | 0.334             | 1.62E-02 |
| <i>DNAJA3</i>                                                                | Increased  | -0.428            | 2.10E-03 |
| <i>FGF9</i>                                                                  | Increased  | -1.980            | 1.72E-14 |
| <i>NR4A2</i>                                                                 | Increased  | Upregulated*      |          |
| <i>SGK1</i>                                                                  | Increased  | NA                |          |
| <i>TOP2A</i>                                                                 | Increased  | 0.230             | NS       |
| <i>TAF1D</i>                                                                 | Increased  | 0.130             | NS       |
| <i>TTK</i>                                                                   | Increased  | 0.090             | NS       |
| <i>MMP8</i>                                                                  | Decreased  | 3.622             | 1.01E-14 |
| <i>LTF</i>                                                                   | Decreased  | 3.48              | 1.16E-11 |
| <i>S100A8</i>                                                                | Decreased  | 3.11              | 5.04E-12 |
| <i>CD83</i>                                                                  | Decreased  | 2.20              | 6.94E-17 |
| <i>TNFAIP3</i>                                                               | Decreased  | 2.14              | 1.53E-20 |
| <i>SAT1</i>                                                                  | Decreased  | 1.403             | 7.31E-15 |
| <i>DUSP5</i>                                                                 | Decreased  | 1.078             | 6.33E-09 |
| <i>SOD2</i>                                                                  | Decreased  | 0.696             | 9.68E-07 |
| <i>NRAS</i>                                                                  | Decreased  | 0.542             | 3.90E-06 |
| <i>MYC</i>                                                                   | Decreased  | -0.946            | 4.04E-10 |
| <i>VIPR1</i>                                                                 | Decreased  | NA                |          |
| <i>HRH2</i>                                                                  | Decreased  | 0.07              | NS       |
| <i>FABP5</i>                                                                 | Decreased  | 0.060             | NS       |
| <i>BUB1B</i>                                                                 | Affected   | 1.75              | 1.48E-07 |
| <i>BCL6</i>                                                                  | Affected   | 1.07              | 1.21E-11 |
| <i>CD55</i>                                                                  | Affected   | 0.93              | 1.48E-09 |
| <i>PLK4</i>                                                                  | Affected   | 0.72              | 4.60E-06 |
| <i>ADCY3</i>                                                                 | Affected   | -0.56             | 1.49E-06 |
| <i>ID3</i>                                                                   | Affected   | NA                |          |

| <b>Apoptosis</b><br><b>z-score=-1.9 (decreased)</b> |            |                   |          |
|-----------------------------------------------------|------------|-------------------|----------|
| Genes in dataset                                    | Prediction | $\Delta\Delta Ct$ | p-value  |
| <i>MMP9</i>                                         | Decreased  | 4.96              | 1.20E-10 |
| <i>AREG</i>                                         | Decreased  | 3.49              | 8.61E-15 |
| <i>CSTA</i>                                         | Decreased  | 2.81              | 2.21E-06 |
| <i>PBK</i>                                          | Decreased  | 2.77              | 1.84E-07 |
| <i>TNFAIP3</i>                                      | Decreased  | 2.14              | 1.53E-20 |
| <i>TYMS</i>                                         | Decreased  | 1.89              | 2.47E-13 |
| <i>CD38</i>                                         | Decreased  | 1.69              | 7.78E-15 |
| <i>NAMPT</i>                                        | Decreased  | 1.61              | 3.62E-16 |
| <i>NFKB1A</i>                                       | Decreased  | 1.43              | 2.38E-20 |
| <i>MCM10</i>                                        | Decreased  | 1.34              | 4.16E-08 |
| <i>SRGN</i>                                         | Decreased  | 1.162             | 2.14E-12 |
| <i>CHEK1</i>                                        | Decreased  | 1.11              | 5.31E-13 |
| <i>HERPUD1</i>                                      | Decreased  | 0.99              | 2.05E-09 |
| <i>VAV3</i>                                         | Decreased  | 0.95              | 1.42E-11 |
| <i>SOD2</i>                                         | Decreased  | 0.70              | 9.68E-07 |
| <i>MXD1</i>                                         | Decreased  | 0.67              | 1.40E-08 |
| <i>NR4A3</i>                                        | Decreased  | 0.55              | 1.96E-03 |
| <i>NRAS</i>                                         | Decreased  | 0.54              | 3.90E-06 |
| <i>RNASEL</i>                                       | Decreased  | -0.32             | 2.55E-02 |
| <i>DNAJA3</i>                                       | Decreased  | -0.43             | 2.10E-03 |
| <i>MYC</i>                                          | Decreased  | -0.95             | 4.04E-10 |
| <i>UBASH3A</i>                                      | Decreased  | -1.33             | 2.53E-13 |
| <i>FGF9</i>                                         | Decreased  | -1.98             | 1.72E-14 |
| <i>NR4A2</i>                                        | Decreased  | Upregulated*      |          |
| <i>SGK1</i>                                         | Decreased  | NA                |          |
| <i>ID3</i>                                          | Decreased  | NA                |          |
| <i>OLR1</i>                                         | Increased  | 3.480             | 5.80E-13 |
| <i>S100A8</i>                                       | Increased  | 3.112             | 5.04E-12 |
| <i>PMAIP1</i>                                       | Increased  | 2.640             | 3.10E-13 |
| <i>CCNE1</i>                                        | Increased  | 1.648             | 3.17E-16 |
| <i>PER1</i>                                         | Increased  | 1.475             | 1.15E-11 |
| <i>SAT1</i>                                         | Increased  | 1.403             | 7.31E-15 |
| <i>MAP3K8</i>                                       | Increased  | 1.300             | 3.89E-10 |
| <i>GADD45B</i>                                      | Increased  | 1.208             | 1.11E-13 |
| <i>BCL6</i>                                         | Increased  | 1.070             | 1.21E-11 |
| <i>CD55</i>                                         | Increased  | 0.926             | 1.48E-09 |
| <i>HSPB1</i>                                        | Increased  | -1.439            | 1.92E-09 |
| <i>CCR8</i>                                         | Increased  | -2.500            | 2.47E-15 |
| <i>TOP2A</i>                                        | Increased  | 0.230             | NS       |
| <i>TNFRSF10D</i>                                    | Increased  | 0.150             | NS       |
| <i>TTK</i>                                          | Increased  | 0.090             | NS       |
| <i>LTF</i>                                          | Affected   | 3.484             | 1.16E-11 |
| <i>ENC1</i>                                         | Affected   | 3.190             | 6.76E-20 |
| <i>ODC1</i>                                         | Affected   | 1.069             | 1.48E-14 |
| <i>ADORA2A</i>                                      | Affected   | -1.248            | 7.13E-09 |
| <i>AKTIP</i>                                        | Affected   | -0.007            | NS       |

| <b>Interphase of tumors cell lines</b><br><b>(G1/S/G2)</b><br><b>z-score=1.8 (increased)</b> |            |                   |          |
|----------------------------------------------------------------------------------------------|------------|-------------------|----------|
| Genes in dataset                                                                             | Prediction | $\Delta\Delta Ct$ | p-value  |
| <i>CCNE1</i>                                                                                 | Increased  | 1.65              | 3.17E-16 |
| <i>E2F8</i>                                                                                  | Increased  | 1.51              | 9.92E-11 |
| <i>NFKB1A</i>                                                                                | Increased  | 1.43              | 2.38E-20 |
| <i>MCM10</i>                                                                                 | Increased  | 1.34              | 4.16E-08 |
| <i>CHEK1</i>                                                                                 | Increased  | 1.11              | 5.31E-13 |
| <i>RBBP8</i>                                                                                 | Increased  | 0.80              | 1.01E-08 |
| <i>MXD1</i>                                                                                  | Increased  | 0.67              | 1.40E-08 |
| <i>MYC</i>                                                                                   | Decreased  | -0.95             | 4.04E-10 |
| <i>ID3</i>                                                                                   | Decreased  | NA                |          |
| <i>MMP9</i>                                                                                  | Affected   | 4.96              | 1.20E-10 |
| <i>TYMS</i>                                                                                  | Affected   | 1.89              | 2.47E-13 |
| <i>DTL</i>                                                                                   | Affected   | 1.61              | 6.68E-09 |
| <i>ZBTB10</i>                                                                                | Affected   | 1.17              | 3.48E-13 |

| <b>Cytostasis (arrest)</b><br><b>z-score=2.2 (increased)</b> |            |                   |          |
|--------------------------------------------------------------|------------|-------------------|----------|
| Genes in dataset                                             | Prediction | $\Delta\Delta Ct$ | p-value  |
| <i>PER1</i>                                                  | Increased  | 1.48              | 1.15E-11 |
| <i>NFKB1A</i>                                                | Increased  | 1.43              | 2.38E-20 |
| <i>GADD45B</i>                                               | Increased  | 1.21              | 1.11E-13 |
| <i>BCL6</i>                                                  | Increased  | 1.07              | 1.21E-11 |
| <i>MXD1</i>                                                  | Increased  | 0.67              | 1.40E-08 |
| <i>TOP2A</i>                                                 | Increased  | 0.23              | NS       |
| <i>NRAS</i>                                                  | Affected   | 0.54              | 3.90E-06 |

| <b>Mitosis</b><br><b>z-score=-1.187 (decreased)</b> |            |                   |          |
|-----------------------------------------------------|------------|-------------------|----------|
| Genes in dataset                                    | Prediction | $\Delta\Delta Ct$ | p-value  |
| <i>CHEK1</i>                                        | Decreased  | 1.11              | 5.31E-13 |
| <i>KIF11</i>                                        | Decreased  | 0.99              | 4.33E-09 |
| <i>RBBP8</i>                                        | Decreased  | 0.80              | 1.01E-08 |
| <i>FGF9</i>                                         | Decreased  | -1.98             | 1.72E-14 |
| <i>BUB1B</i>                                        | Increased  | 1.75              | 1.48E-07 |
| <i>CCNE1</i>                                        | Increased  | 1.65              | 3.17E-16 |
| <i>SKA3</i>                                         | Affected   | 2.77              | 6.37E-04 |
| <i>PTP4A1</i>                                       | Affected   | 0.53              | 2.85E-05 |
| <i>TOP2A</i>                                        | Affected   | 0.23              | NS       |
| <i>TTK</i>                                          | Affected   | 0.09              | NS       |

**Additional file 8. Ingenuity functional prediction analysis of the signature of T<sub>CM</sub> cells in HIV infection.** Ingenuity functional prediction analysis was made with IPA software.  $\Delta\Delta Ct$  and p-values represent RT-PCR validation values. \* Upregulation was inferred in the absence of a  $\Delta\Delta Ct$  value, based on amplification in patients' cells ( $\Delta Ct=6.5$ ), but no amplification in cells from controls. NS: Not significant. NA: no amplification.
